# Supplementary material
Source: ML conference proceedings conference paper supplement (https://openaccess.thecvf.com/content/WACV2026/html/Almorsy_An_Efficient_Multi-Rater_WACV_2026_paper.html)

**More random examples from the NPC-120 test set showing that our personalization network with only one annotation (\*) or two annotations (\*\*) per sample consistently outperforms the SOTA D-Persona model, which uses all 4 annotations per sample**

**Yellow = Label**  
**Overlapping orange = Prediction**

P-Diverse (Ours) Stage-I\*

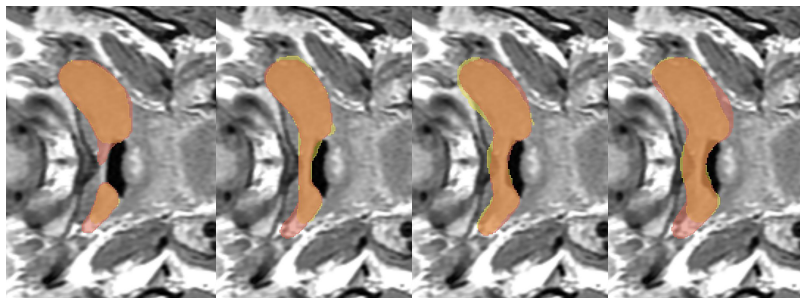

P-Diverse (Ours) Stage-I\*\*

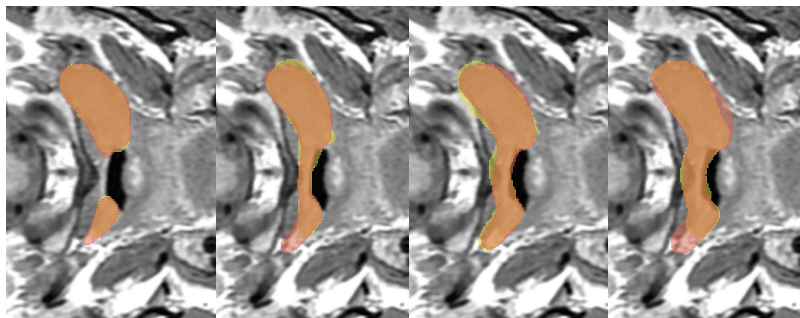

D-Persona Stage-II

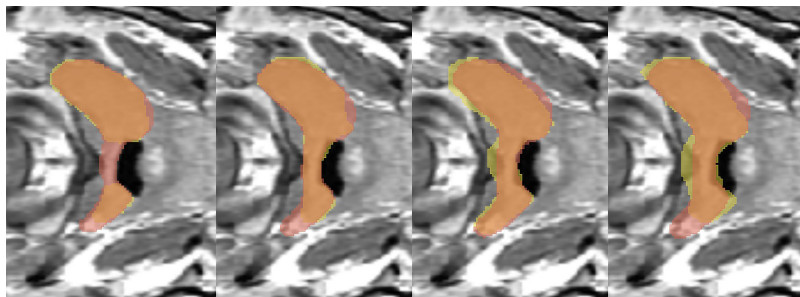

P-Diverse (Ours) Stage-I\*

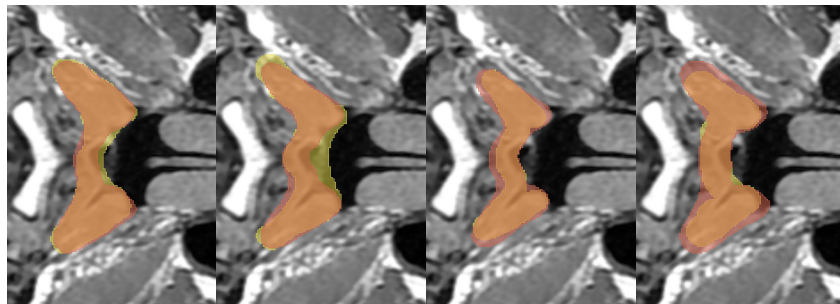

P-Diverse (Ours) Stage-I\*\*

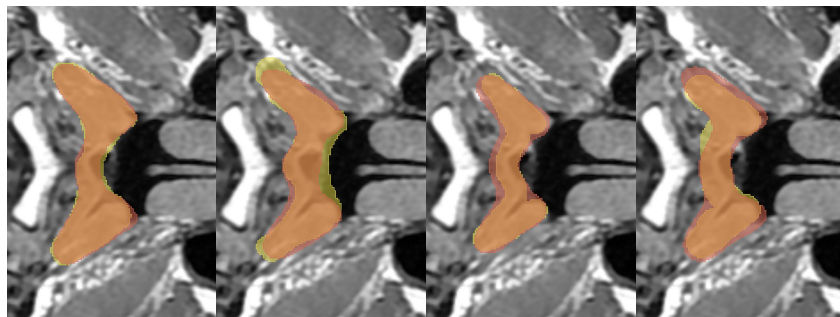

D-Persona Stage-II

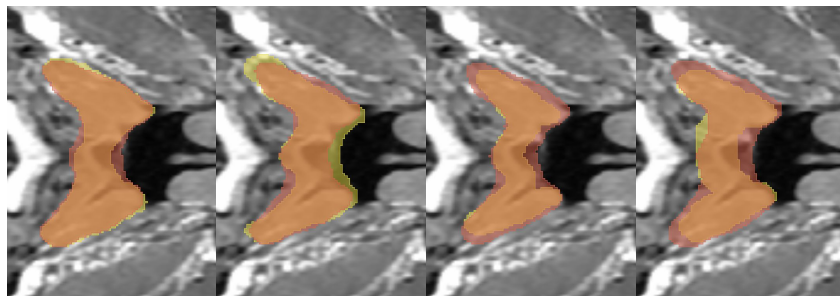

Supplement: Supplementary file 2 [file More-personalized-visualizations.pdf › 1836_supp/More-personalized-visualizations.pdf]
